# Supplementary material
Source: PubMed Central journal article supplement (PMC124301)

DMSO

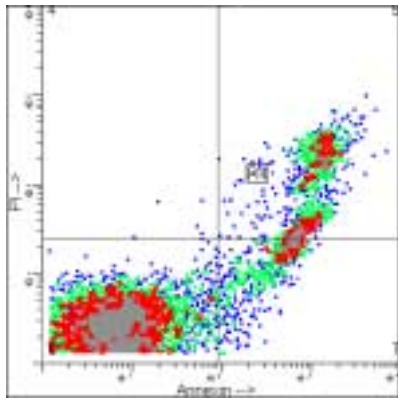

E2 (5  $\mu\text{g}/\text{kg}$ )

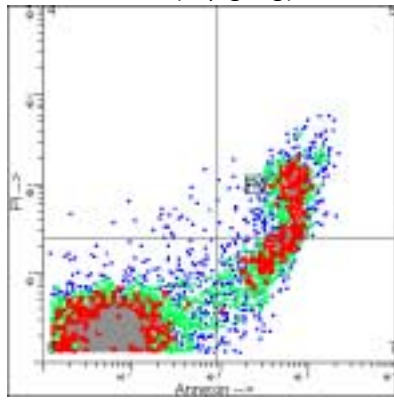

Genistein (200  $\text{mg}/\text{kg}$ )

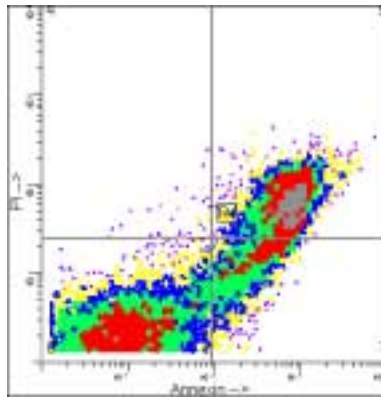

Supplement: pnas_102650199_2.pdf [file pnas_102650199_2.pdf]
